# Supplementary material
Source: PubMed Central journal article supplement (PMC1599905)

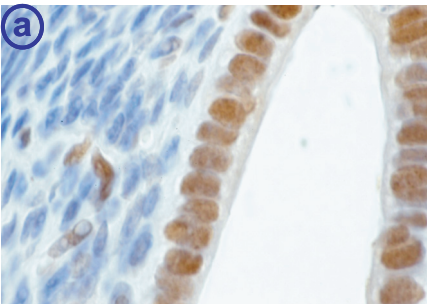

**Control**

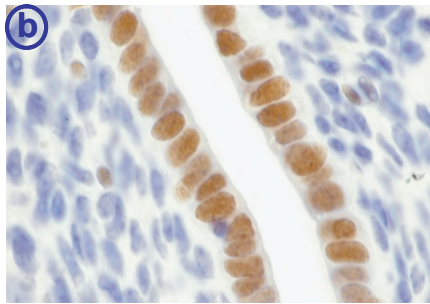

**E2 4hr**

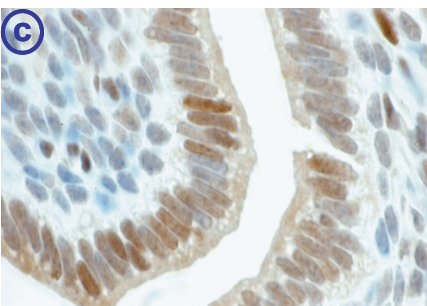

**P4 4hr**

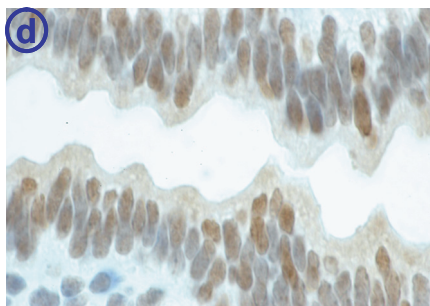

**P4E2 1hr**

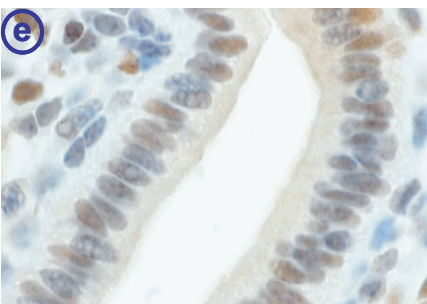

**P4E2 4hr**

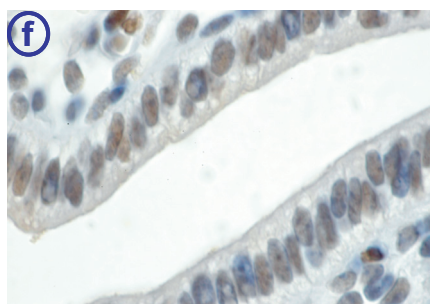

**P4E2 8hr**

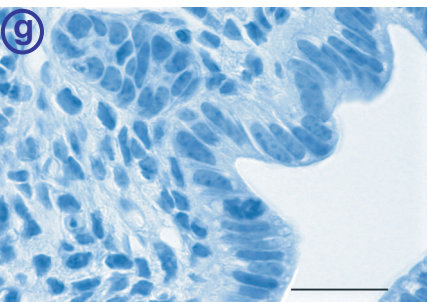

**MCM2-Neg-Control**

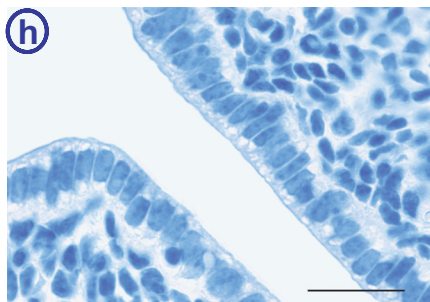

**MCM6-Neg-Control**

Supplement: pnas_0601271103_1.pdf [file pnas_0601271103_1.pdf]
